# Supplementary material
Source: PubMed Central journal article supplement (PMC5503715)
Supplement: supp_fj.201700149_Supplemental_Figure.pdf [file supp_fj.201700149_Supplemental_Figure.pdf]

# eNOS System Proteins in EDEs

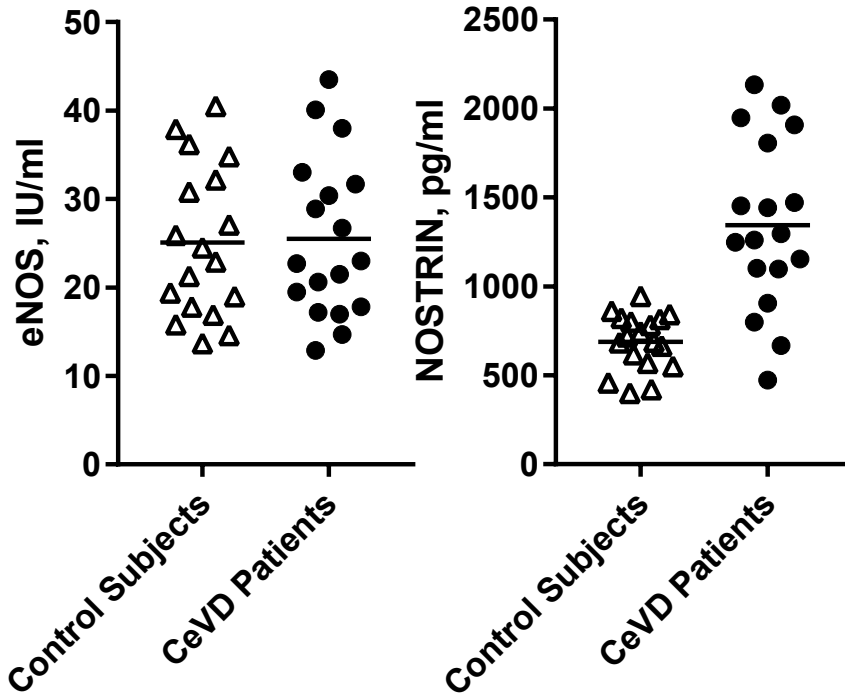

## Legend- Supplemental Figure 1- eNOS System Proteins in EDEs.

Each point represents a value for one CeVD patient or control subject and the mean for a group is depicted by the horizontal line in that cluster. The eNOS mean $\pm$ SEM values are 25.1 $\pm$ 2.02 IU/ml for control subjects (n=18) and 25.5 $\pm$ 2.13 IU/ml for CeVD patients (n=18), and the NOSTRIN mean $\pm$ SEM values are 688 $\pm$ 37.3 pg/ml for control subjects and 1343 $\pm$ 113 pg/ml for CeVD patients. The difference between NOSTRIN levels for the two groups is significant with  $p < 0.0001$  by an unpaired t test, whereas there is no significant difference between eNOS levels of the two groups.
